# Supplementary material
Source: Springer Nature journal article supplement (https://www.springermedizin.de/resource/supplementary/12889_2012_5690_MOESM2_ESM.pdf/9495710)

a

Gender Equity Index

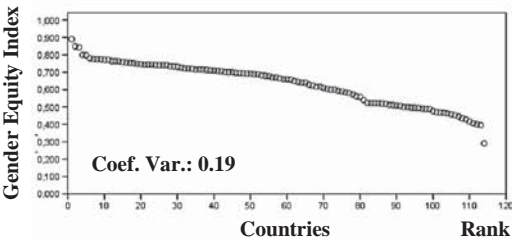

Rank coef. = 0.95 (p&lt;0.001)

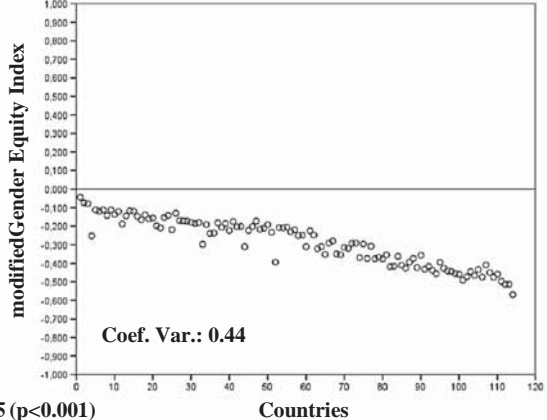

b

Education gender gap

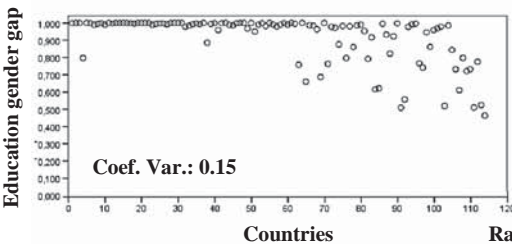

Rank coef. = 0.36 (p&lt;0.001)

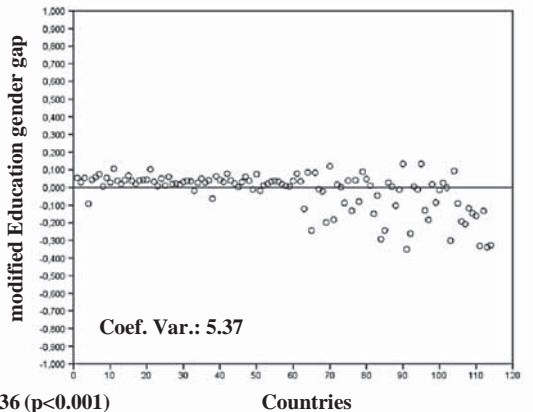

c

Economic activity gender gap

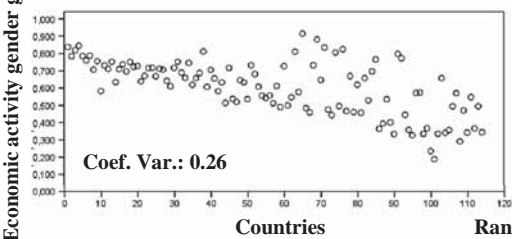

Rank coef. = 0.99 (p&lt;0.001)

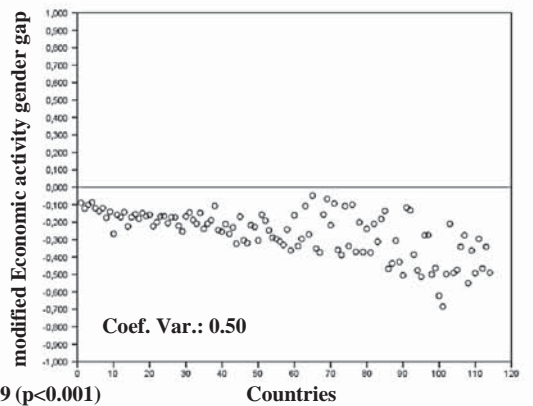

d

Empowerment gender gap

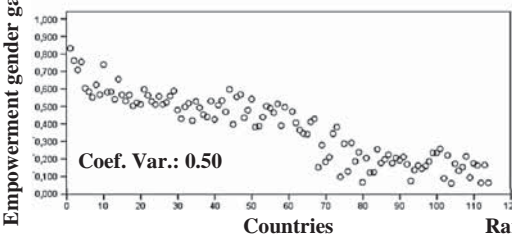

Rank coef. = 0.95 (p&lt;0.001)

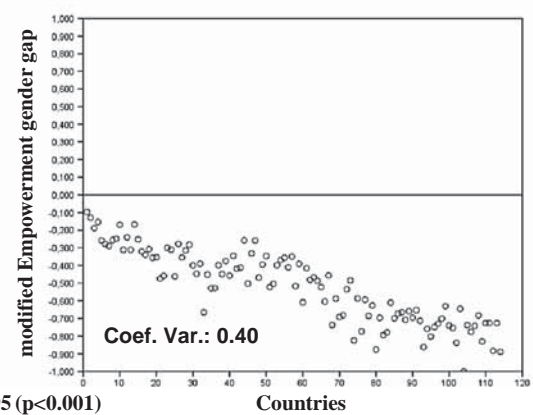

Supplement: MOESM2 [file 9495710]
